# Supplementary material
Source: MDPI journal article supplement (https://www.mdpi.com/2073-4395/13/4/1051)
Supplement: s1 [file s1]

**Table S1** List of primers used in this study.

| <b>Primer Name</b> | <b>PrimerSequence (5'→3')</b>                | <b>Purpose</b>                   |
|--------------------|----------------------------------------------|----------------------------------|
| <i>FvActin-F</i>   | GCGACAATGGAACTGGAATGG                        | qPCR                             |
| <i>FvActin-R</i>   | GACAATTTCCCGTTCAGCAGTG                       | qPCR                             |
| <i>FvMYB44-qF</i>  | GCTAGTGCTATTTATGCAAC                         | qPCR                             |
| <i>FvMYB44-qR</i>  | GTCGCATGGTAAGTAACT                           | qPCR                             |
| <i>FvMYB44-F</i>   | ATGGCTAATCACAATGCTAG                         | full-length cDNA of FvMYB44      |
| <i>FvMYB44-R</i>   | TCATGTGGCTCCAACCCCAAGAA                      | full-length cDNA of FvMYB44      |
| <i>HR-F</i>        | AGAACACGGGGACGAGCTCATGGCTAATCACAATGCTAG      | PCR for homologous recombination |
| <i>HR-R</i>        | ACCATGGTGTCTGACTCTAGATCATGTGGCTCCAACCCCAAGAA | PCR for homologous recombination |
| <i>FvMYB44-sIF</i> | GGATCCCCTAGGCAAAAGAGTGAAAG                   | For subcellular localization     |
| <i>FvMYB44-sIR</i> | TCACTTATGAAATAGCCATGAAACC                    | For subcellular localization     |
